# Supplementary material
Source: PubMed Central journal article supplement (PMC4190109)
Supplement: NIHMS565434-supplement-supplement_1.pdf [file NIHMS565434-supplement-supplement_1.pdf]

Supplement Table 1

Blood Glucose Levels in Non-Diabetic Female NOD Mice Exposed to Genistein for up to 180 Days

| Parameter | Naive            | Vehicle          | GEN (mg/kg)      |                  |                  | H/NH | Trend Analysis |
|-----------|------------------|------------------|------------------|------------------|------------------|------|----------------|
|           |                  |                  | 2                | 6                | 20               |      |                |
| Week 1    | 165 ± 5*<br>(23) | 136 ± 5<br>(24)  | 152 ± 5<br>(24)  | 154 ± 4<br>(24)  | 152 ± 6<br>(24)  | H    | NS             |
| Week 2    | 128 ± 3<br>(23)  | 132 ± 2<br>(23)  | 135 ± 3<br>(24)  | 128 ± 3<br>(24)  | 138 ± 2<br>(24)  | H    | NS             |
| Week 3    | 143 ± 3<br>(23)  | 132 ± 4<br>(23)  | 149 ± 7<br>(24)  | 136 ± 5<br>(24)  | 131 ± 4<br>(24)  | H    | NS             |
| Week 4    | 117 ± 2<br>(23)  | 120 ± 1<br>(23)  | 112 ± 2*<br>(24) | 112 ± 2*<br>(24) | 119 ± 2<br>(24)  | H    | NS             |
| Week 5    | 124 ± 3<br>(23)  | 129 ± 4<br>(23)  | 136 ± 4<br>(24)  | 142 ± 4*<br>(24) | 126 ± 4<br>(23)  | H    | NS             |
| Week 6    | 117 ± 3<br>(23)  | 118 ± 2<br>(23)  | 116 ± 2<br>(24)  | 114 ± 3<br>(24)  | 118 ± 2<br>(23)  | H    | NS             |
| Week 7    | 126 ± 4<br>(22)  | 140 ± 4<br>(23)  | 142 ± 4<br>(24)  | 137 ± 7<br>(23)  | 149 ± 5<br>(23)  | H    | NS             |
| Week 8    | 120 ± 2<br>(21)  | 117 ± 3<br>(22)  | 117 ± 2<br>(23)  | 117 ± 3<br>(22)  | 119 ± 4<br>(22)  | H    | NS             |
| Week 9    | 142 ± 5<br>(21)  | 140 ± 4<br>(21)  | 131 ± 5<br>(22)  | 137 ± 4<br>(22)  | 130 ± 3<br>(21)  | H    | NS             |
| Week 10   | 127 ± 4<br>(20)  | 123 ± 3<br>(22)  | 118 ± 2<br>(22)  | 129 ± 5<br>(21)  | 131 ± 6<br>(21)  | H    | NS             |
| Week 11   | 141 ± 7<br>(20)  | 135 ± 6<br>(20)  | 116 ± 3*<br>(22) | 133 ± 5<br>(21)  | 128 ± 4<br>(21)  | H    | NS             |
| Week 12   | 138 ± 7<br>(20)  | 140 ± 7<br>(19)  | 121 ± 3<br>(22)  | 135 ± 6<br>(21)  | 122 ± 5<br>(20)  | H    | NS             |
| Week 13   | 142 ± 10<br>(14) | 148 ± 6<br>(16)  | 153 ± 5<br>(22)  | 161 ± 5<br>(18)  | 132 ± 7<br>(18)  | H    | NS             |
| Week 14   | 148 ± 8<br>(14)  | 148 ± 8<br>(13)  | 134 ± 6<br>(22)  | 144 ± 7<br>(16)  | 133 ± 6<br>(17)  | H    | NS             |
| Week 15   | 157 ± 11<br>(10) | 168 ± 10<br>(11) | 134 ± 5*<br>(19) | 157 ± 13<br>(16) | 131 ± 7*<br>(17) | H    | NS             |
| Week 16   | 139 ± 10<br>(9)  | 136 ± 10<br>(9)  | 126 ± 3<br>(19)  | 153 ± 9<br>(18)  | 126 ± 5<br>(16)  | H    | NS             |
| Week 17   | 158 ± 13<br>(8)  | 152 ± 7<br>(8)   | 153 ± 9<br>(17)  | 158 ± 9<br>(14)  | 146 ± 8<br>(16)  | H    | NS             |
| Week 18   | 162 ± 25<br>(4)  | 157 ± 16<br>(6)  | 153 ± 11<br>(17) | 161 ± 10<br>(15) | 140 ± 9<br>(17)  | H    | NS             |
| Week 19   | 135 ± 8<br>(3)   | 141 ± 12<br>(5)  | 155 ± 12<br>(15) | 148 ± 13<br>(12) | 139 ± 7<br>(14)  | H    | NS             |
| Week 20   | 147 ± 19<br>(4)  | 138 ± 11<br>(5)  | 152 ± 11<br>(15) | 159 ± 8<br>(15)  | 135 ± 7<br>(16)  | H    | NS             |
| Week 21   | 178 ± 25<br>(4)  | 148 ± 12<br>(5)  | 151 ± 12<br>(12) | 145 ± 6<br>(15)  | 160 ± 11<br>(15) | H    | NS             |
| Week 22   | 152 ± 7<br>(3)   | 157 ± 12<br>(4)  | 158 ± 14<br>(8)  | 169 ± 11<br>(13) | 141 ± 7<br>(12)  | H    | NS             |
| Week 23   | 132 ± 11<br>(3)  | 164 ± 15<br>(5)  | 164 ± 12<br>(13) | 161 ± 11<br>(12) | 151 ± 11<br>(16) | NH   | p ≤ 0.05       |
| Week 24   | 179 ± 11*<br>(3) | 122 ± 10<br>(4)  | 137 ± 10<br>(9)  | 146 ± 10<br>(12) | 141 ± 6<br>(14)  | NH   | NS             |
| Week 25   | 175 ± 26<br>(3)  | 140 ± 11<br>(4)  | 148 ± 13<br>(8)  | 152 ± 11<br>(12) | 141 ± 8<br>(14)  | NH   | NS             |
| Week 26   | NA               | 221 ± 13<br>(2)  | 188 ± 12<br>(3)  | 183 ± 41<br>(3)  | 194 ± 13<br>(11) | NH   | NS             |

Female NOD mice were either untreated (Naïve), or administered vehicle (25 mM Na<sub>2</sub>CO<sub>3</sub>) or genistein (GEN) by gavage daily for up to 180 days. Blood glucose levels were measured as described. Values represent the mean ± SE derived from the number of animals indicated in parentheses. H = homogeneous data and NH = non-homogeneous data. \*, p ≤ 0.05 when compared to vehicle control. NS = Not Significant. NA = Not applicable because all mice were diabetic.
